# Supplementary material
Source: Springer Nature journal article supplement (https://www.springermedizin.de/resource/supplementary/12957_2012_1020_MOESM5_ESM.pdf/9561622)

# Disease Specific Survival

Proportion

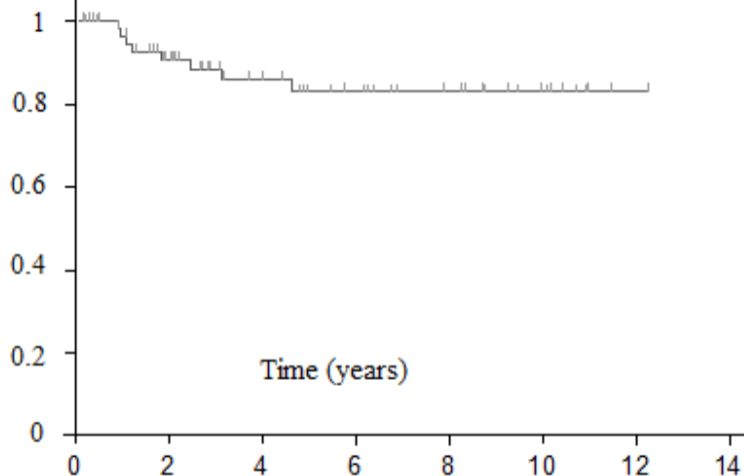

Time (years)

Numbers at Risk

66      44      30      23      17      9      1      0

Supplement: MOESM5 [file 9561622]
